# Supplementary material for: Separator-free and concentrated LiNO3electrolyte cells enable uniform lithium electrodeposition
Source: Royal Society of Chemistry journal article supplement (doi:10.1039/c9ta10929c), 2020-01-01
Supplement: c9ta10929c1.pdf [file c9ta10929c1.pdf]

## Supporting Information *for*

# Separator-Free and Concentrated LiNO<sub>3</sub> Electrolyte Cells Enable Uniform Lithium Electrodeposition

*Rodrigo Rodriguez<sup>†</sup>, Ruth A. Edison<sup>‡</sup>, Ryan M. Stephens<sup>⊥</sup>, Ho-Hyun Sun<sup>†</sup>, Adam Heller<sup>†,§</sup>, and C. Buddie Mullins<sup>\*†‡§//</sup>*

<sup>†</sup>McKetta Department of Chemical Engineering, The University of Texas at Austin, Austin, Texas 78712-1589, United States

<sup>‡</sup>Department of Physics, The University of Texas at Austin, Austin, Texas 78712-1192, United States

<sup>‡</sup>Texas Materials Institute, The University of Texas at Austin, Austin, Texas 78712-1591, United States

<sup>§</sup>Department of Chemistry, The University of Texas at Austin, Austin, Texas 78712-1224, United States

<sup>//</sup>Center for Electrochemistry, The University of Texas at Austin, Austin Texas 78712-0165, United States

<sup>⊥</sup>Shell International Exploration & Production Inc., Houston, Texas 77082, United States

\*E-mail: [mullins@che.utexas.edu](mailto:mullins@che.utexas.edu).

## SUPPORTING INFORMATION

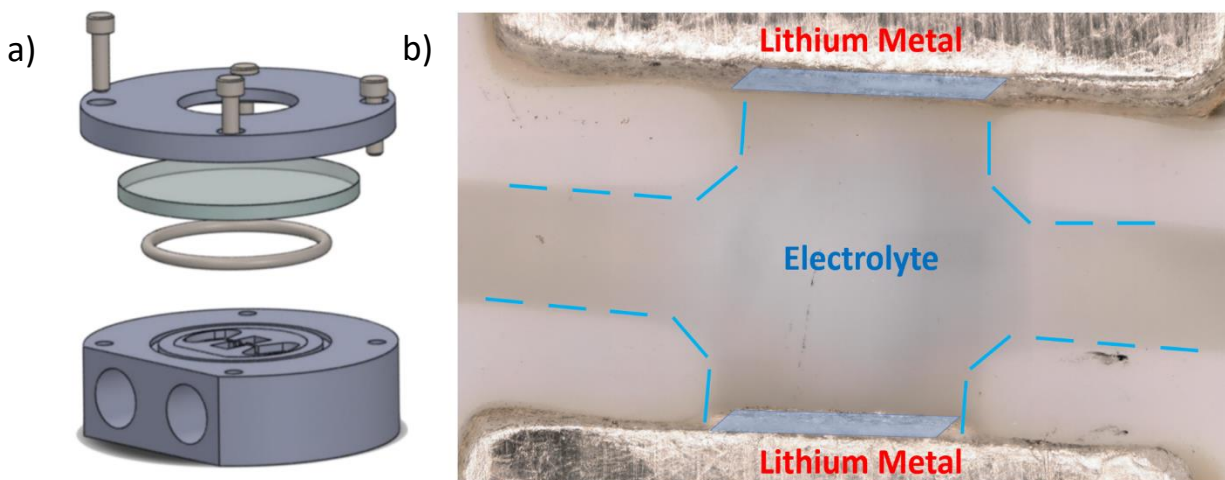

**Figure S1.** 3D CAD schematic of the optical cell utilized in this work (a). b) illustrates an assembled Li|Li visualization cell. The light blue outlines illustrate the walls of the optical cell that hold the lithium in place. The highlighted areas on the lithium electrodes are the deposition/dissolution sites. Only electrolyte, without a separator, spans the distance between the electrodes.

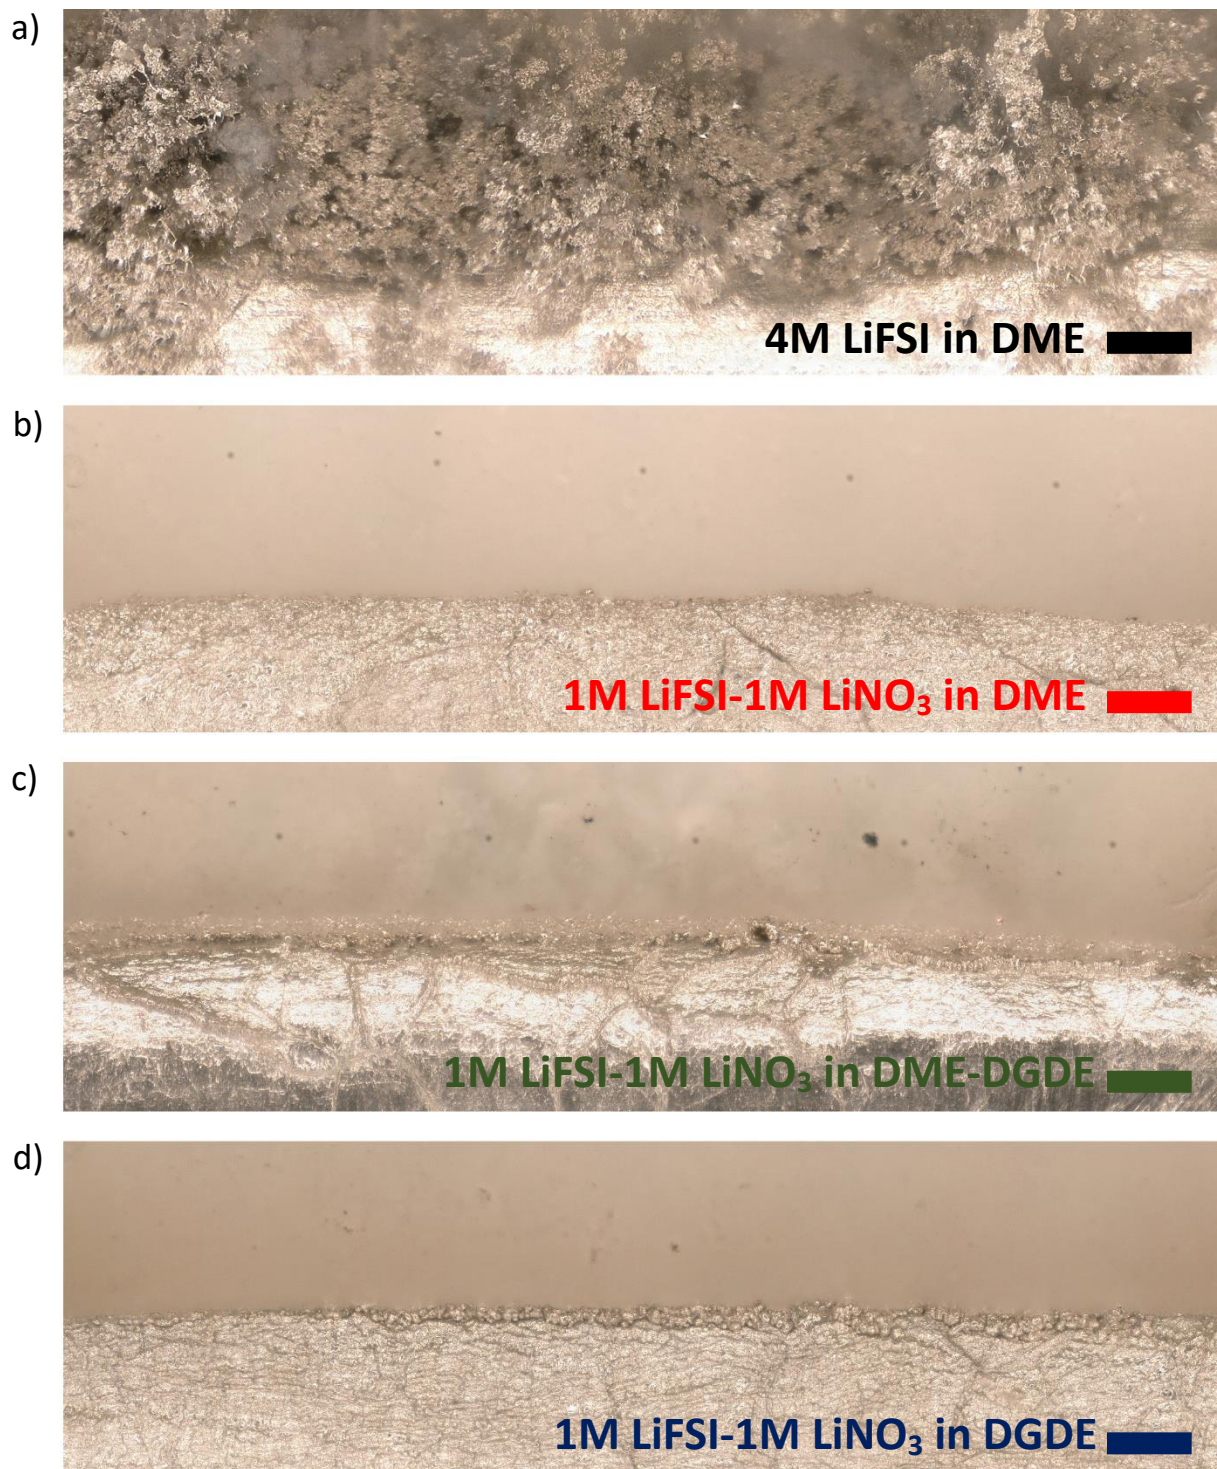

**Figure S2.** Lithium electrodes after passing 6 mAh cm<sup>-2</sup> of charge with a current density of 1 mA cm<sup>-2</sup>. Electrolytes utilized: (a) 4M LiFSI in DME, (b) 1M LiFSI with 1M LiNO<sub>3</sub> in DME, (c) 1M LiFSI with 1M LiNO<sub>3</sub> in DME and DGDE, and (d) 1M LiFSI with 1M LiNO<sub>3</sub> in DGDE. The scale bars are 200 μm.



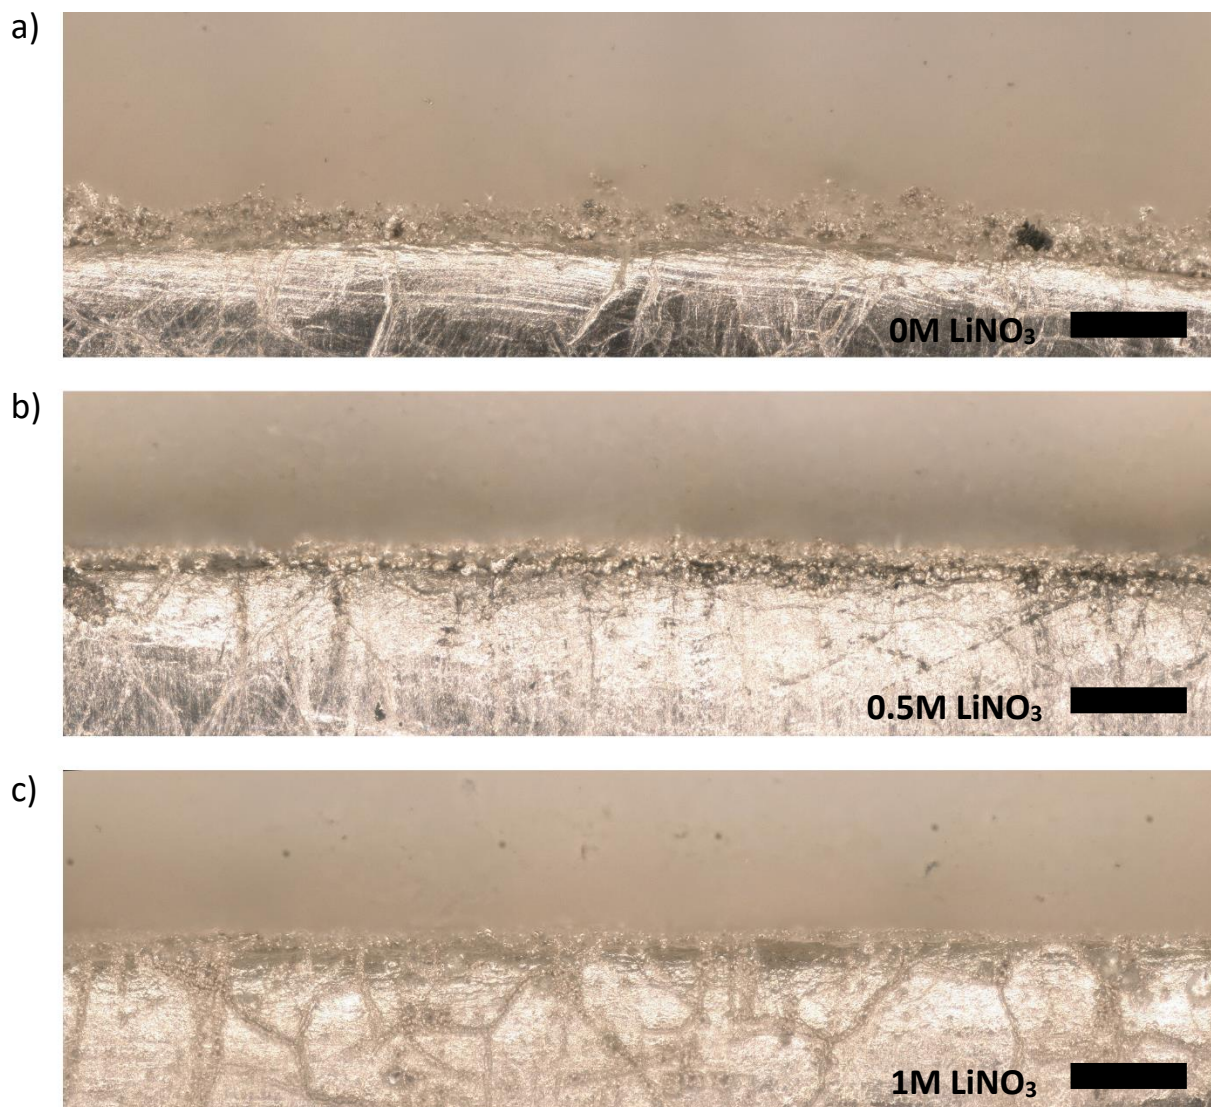

**Figure S3.** Lithium electrodes after passing 6 mAh cm<sup>-2</sup> of charge with a current density of 0.5 mA cm<sup>-2</sup> with 1M LiFSI co-salt and varying LiNO<sub>3</sub> concentrations: (a) no LiNO<sub>3</sub> salt, (b) 0.5M LiNO<sub>3</sub>, and (c) 1M LiNO<sub>3</sub>. Scale bars are 200 μm.

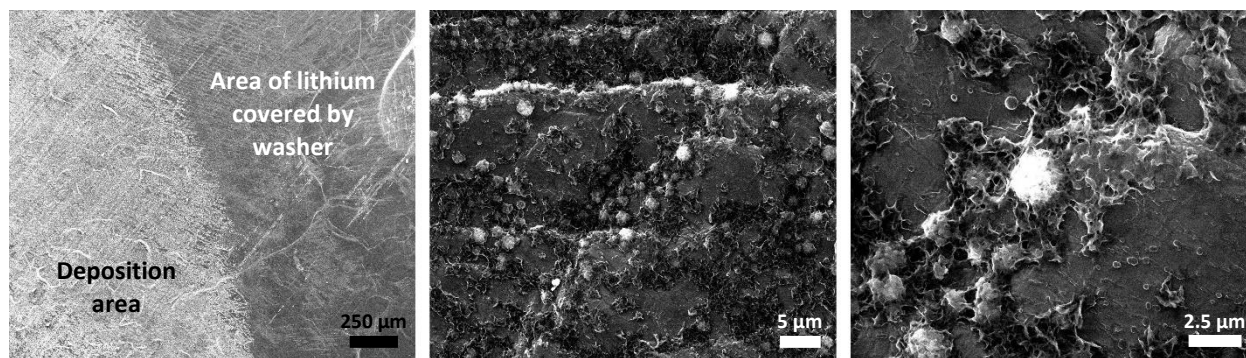

**Figure S4.** SEM images of a  $1 \text{ mAh cm}^{-2}$  Li-deposit cycled at  $1 \text{ mA cm}^{-2}$  using a  $1 \text{ M LiNO}_3$  with  $1 \text{ M LiFSI}$  in DGDE electrolyte. A washer was used in this electrodeposition.

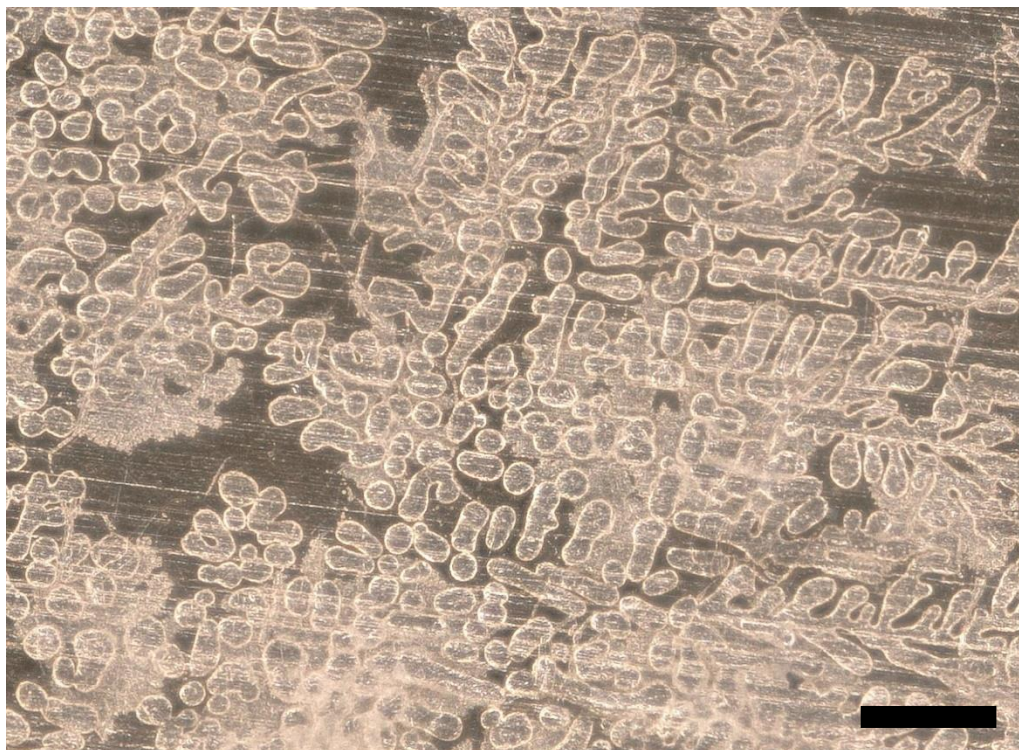

**Figure S5.** Optical image of a  $1 \text{ mAh cm}^{-2}$  Li-deposit cycled at  $1 \text{ mA cm}^{-2}$  using a  $1 \text{ M LiNO}_3$  with  $1 \text{ M LiFSI}$  in DGDE electrolyte. A washer and polymer separator were used in this electrodeposition; the washer held the separator in place but did not press down on it where the deposition occurred. Scale bar is  $100 \text{ μm}$ .



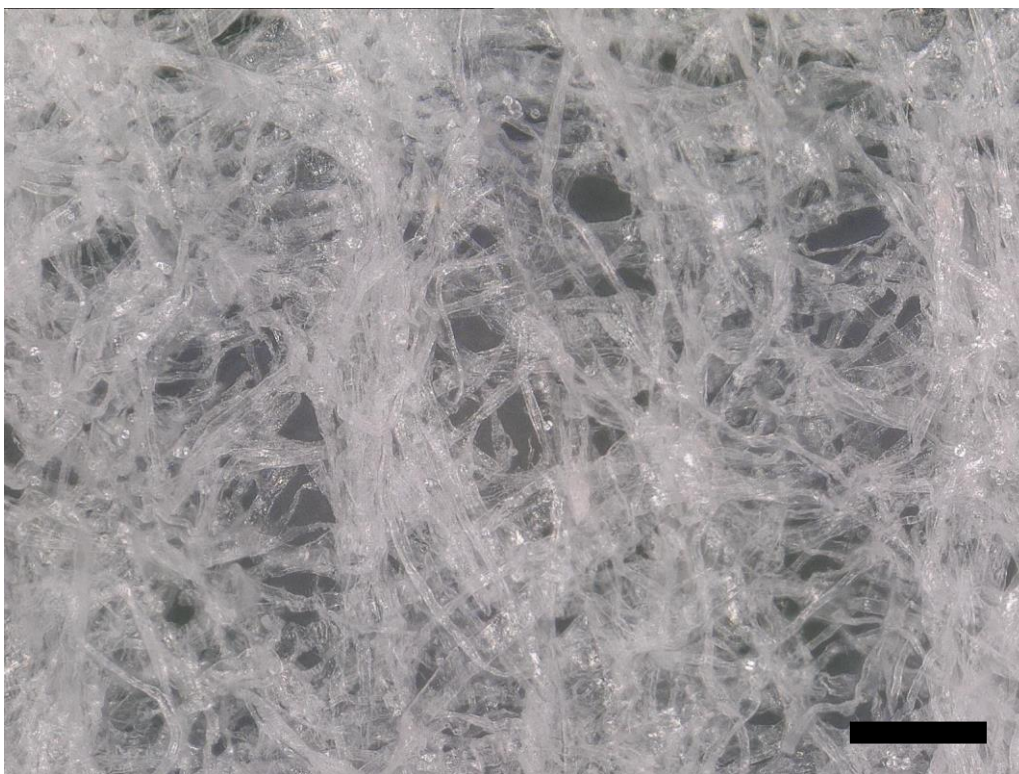

**Figure S6.** Optical image of Kimwipe. Scale bar is 200  $\mu\text{m}$ .

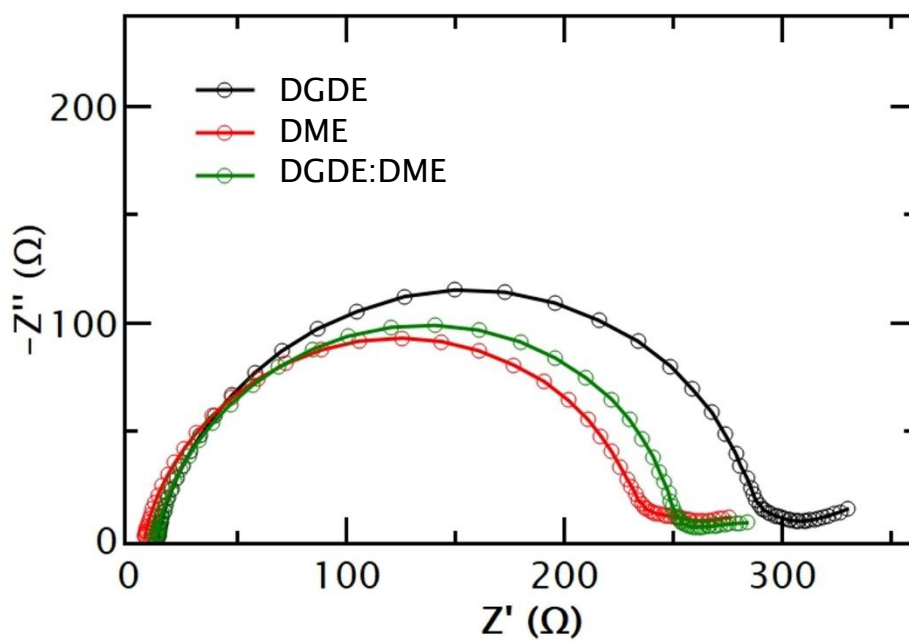

**Figure S7.** EIS spectra of 1M  $\text{LiNO}_3$  with 1M LiFSI electrolytes in DGDE, DME, and DGDE:DME (1:1 vol%) symmetrical Li|Li cells before cycling.

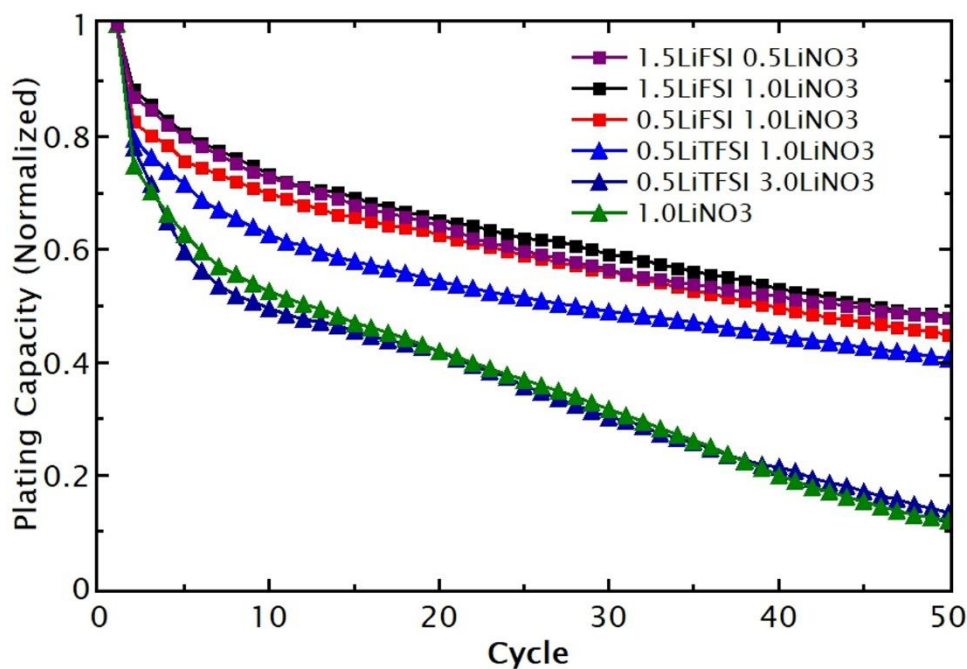

**Figure S8.** Retention of the coulombic capacity of LFP|Cu cells for different electrolytic solutions normalized to the first cycle. All electrolytes utilized the DGDE solvent.

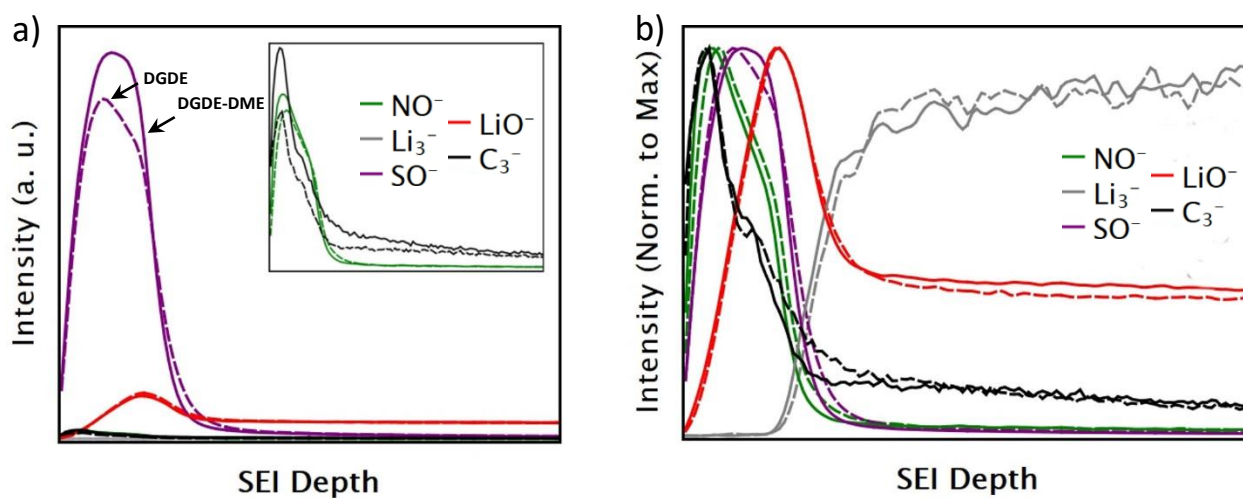

**Figure S9.** Time-of-flight depth profiling of the DGDE:DME (solid) and DME (solid) based electrolytes. a) compares the SEI of lithium electrodes soaked in electrolyte for the DME and DME-DGDE electrolytes and b) shows the same SEI normalized to the maxima of each individual species.
